# Supplementary material for: Overcoming aggregation with laser heated nanoelectrospray mass spectrometry: thermal stability and pathways for loss of bicarbonate from carbonic anhydrase II
Source: Royal Society of Chemistry journal article supplement (doi:10.1039/d4an00229f), 2024-01-01
Supplement: d4an00229f1.pdf [file d4an00229f1.pdf]

## Supporting Information

for

**Overcoming Aggregation with Laser Heated Nanoelectrospray Mass Spectrometry:  
Thermal Stability and Pathways for Loss of Bicarbonate from Carbonic Anhydrase II**

Jacob S. Jordan, Katherine J. Lee, and Evan R. Williams\*

Department of Chemistry, University of California, Berkeley, CA 94720

\*To whom correspondence should be addressed

e-mail: [erw@berkeley.edu](mailto:erw@berkeley.edu)

## Contents

|                                                                                                             |           |
|-------------------------------------------------------------------------------------------------------------|-----------|
| <b>Figure S1. Abundances of cyt <i>c</i> and BCAII as a function of Laser Power or Solution Temperature</b> | <b>S3</b> |
| <b>Figure S2. Mass Spectra of BCAII Charge States Before and After Laser Heating</b>                        | <b>S4</b> |
| <b>Figure S3. Two Protein Calibration Method for Converting Laser Power to Solution Temperature</b>         | <b>S5</b> |
| <b>Figure S4. Modeling the Theoretical Abundance of U Originating from the BF→U Pathway</b>                 | <b>S7</b> |

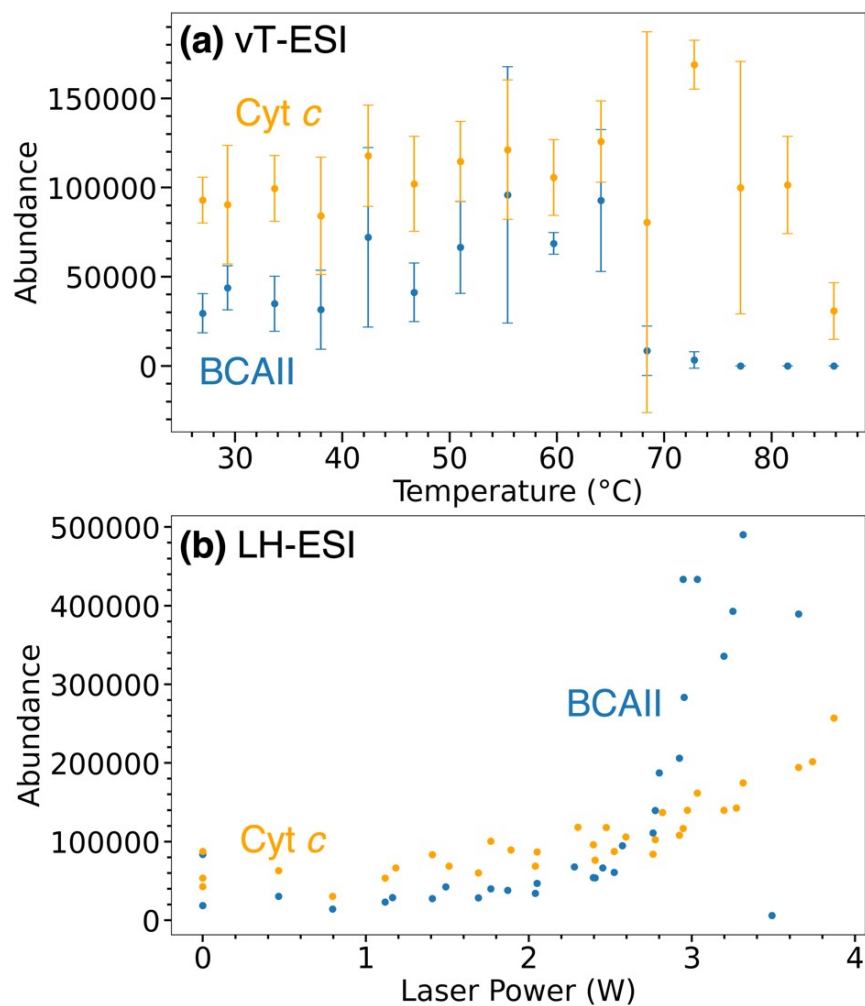

**Supporting Figure 1.** The total ion abundances of BCAII (blue) and *cyt c* (orange) as a function of (a) solution temperature and (b) laser power. Aggregation above  $\sim 72$  °C results in no BCAII signal and low *cyt c* signal in vT-ESI experiments, whereas high laser powers increase protein signal for both proteins before a sharp decrease in abundance of BCAII at laser powers  $> \sim 3.3$  W.

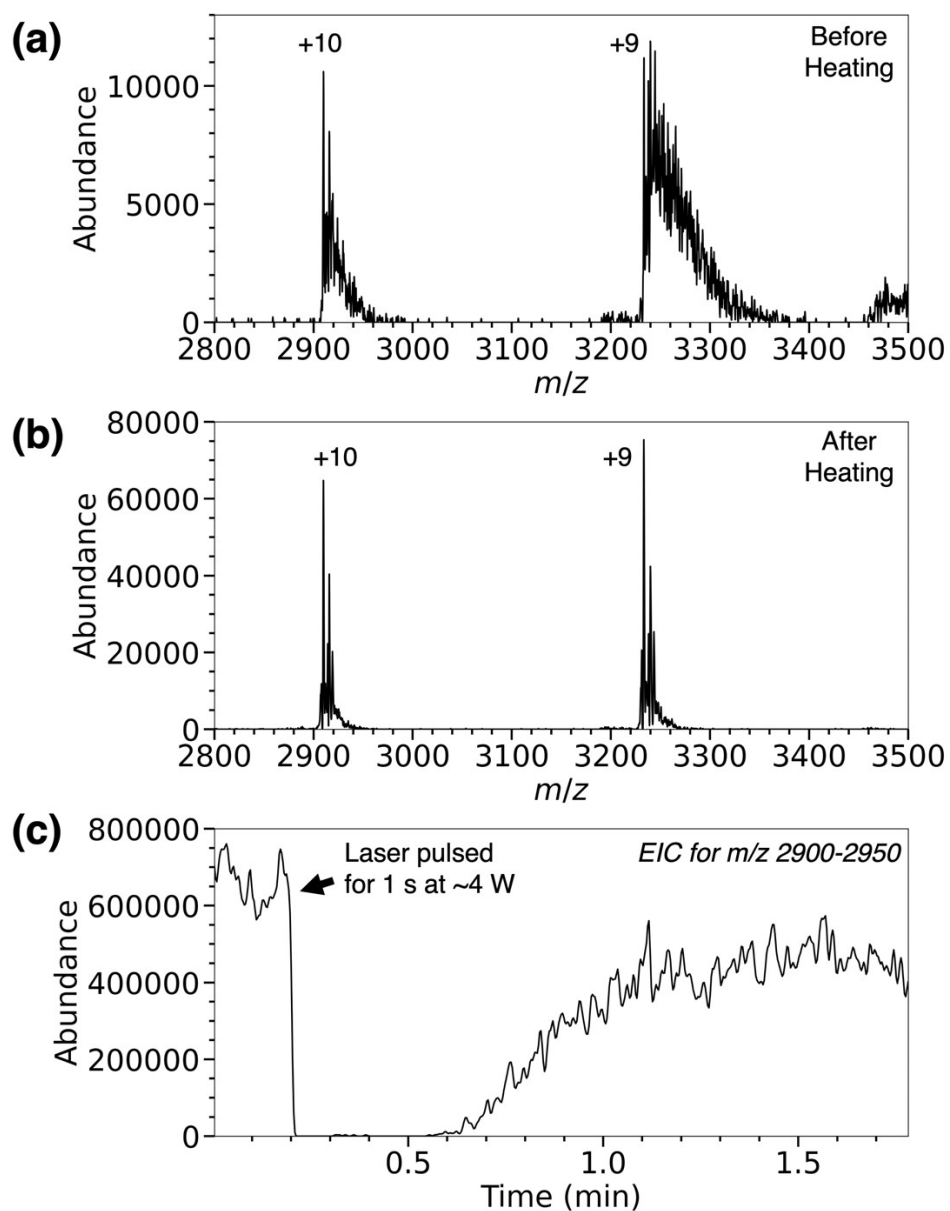

**Supporting Figure 2.** Small molecule/ion adduction to BCAII results in (a) charge states that tail to higher  $m/z$  before heating, but (b) significantly narrower charge states after heating and a return of the solution to room temperature indicating that a thermal cycle can significantly reduce adduction. A typical (c) extracted ion chromatogram (EIC) for the region of 2900 – 2950  $m/z$  (the +10 charge state) demonstrates the time required for aggregated material to be expelled from the heated portion of the emitter and signal to return after laser heating at ~4 W.

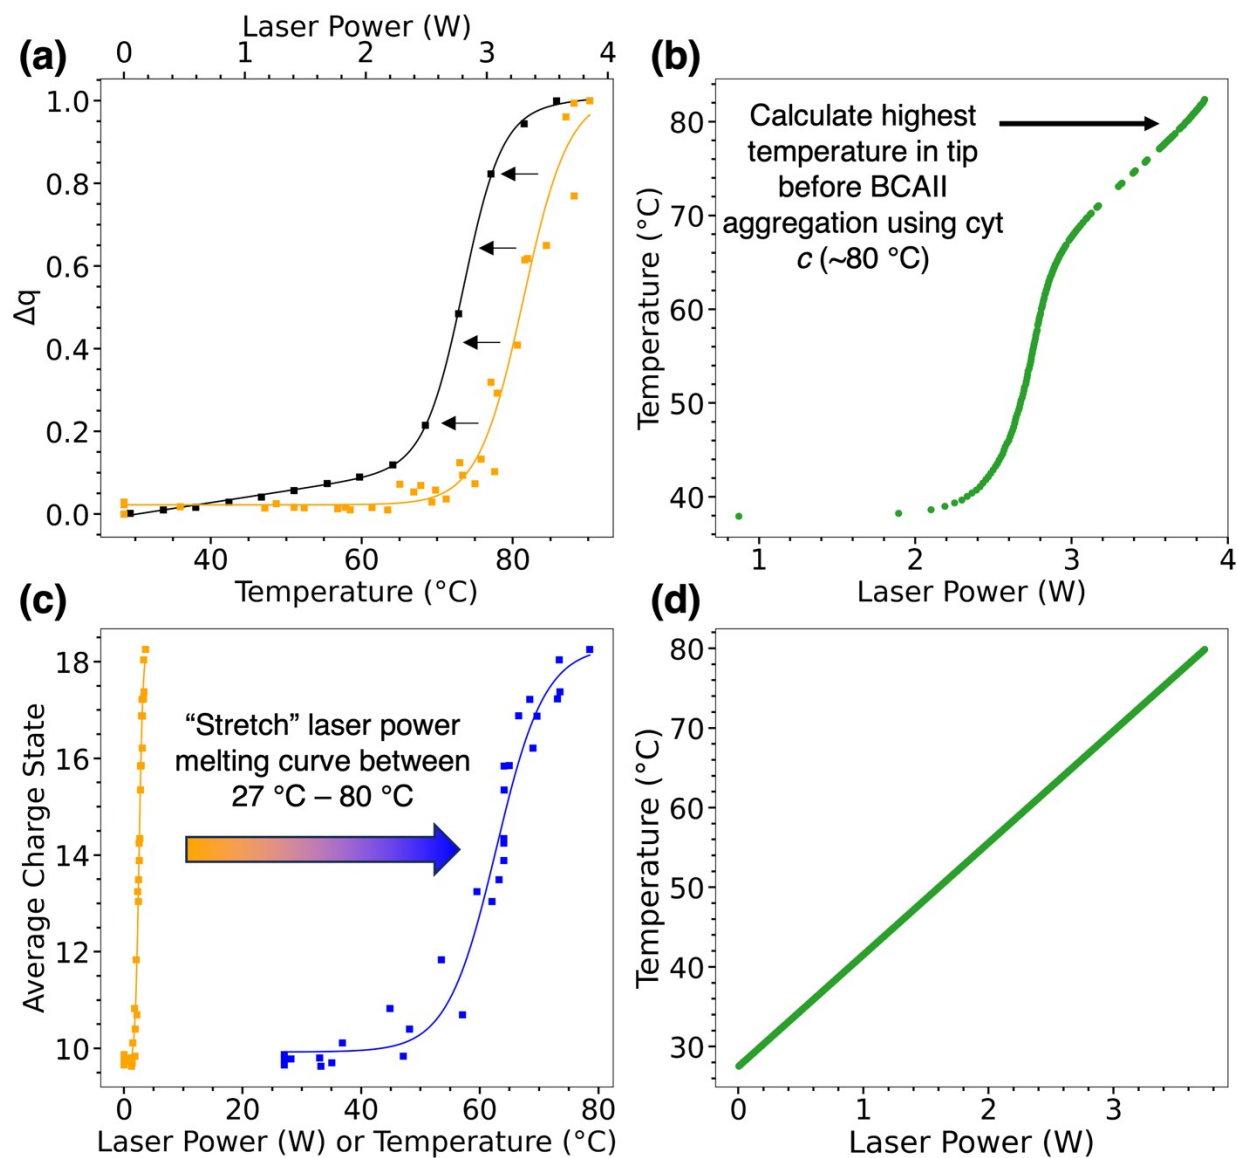

**Supporting Figure 3.** The two-protein calibration procedure consists of (a) aligning the normalized change in the weighted average charge state of cyt *c* measured by vT-ESI and LH-ESI to (b) determine the temperature in the tip at high laser powers. The BCAII melting curve (c) determined by LH-ESI (in yellow) was then mapped between room temperature and  $\sim 80^{\circ}\text{C}$  (mapped function in blue) to generate (d) a linear calibration function for converting laser power to solution temperature. In contrast to a prior LH-ESI report where cyt *c* was used to establish a relationship between laser power and solution temperature,<sup>1</sup> a linear temperature calibration is

generated here by “stretching” the sigmoidal fit for BCAII determined by LH-ESI between room temperature (27 °C) and the maximum temperature in the tip before BCAII aggregation determined using *cyt c* unfolding (~80 °C). The  $T_m$  values determined for BCAII and *cyt c* using this method are  $63.4 \pm 0.6$  °C and  $73.9 \pm 0.5$  °C, in excellent agreement with literature  $T_m$  values for these proteins.

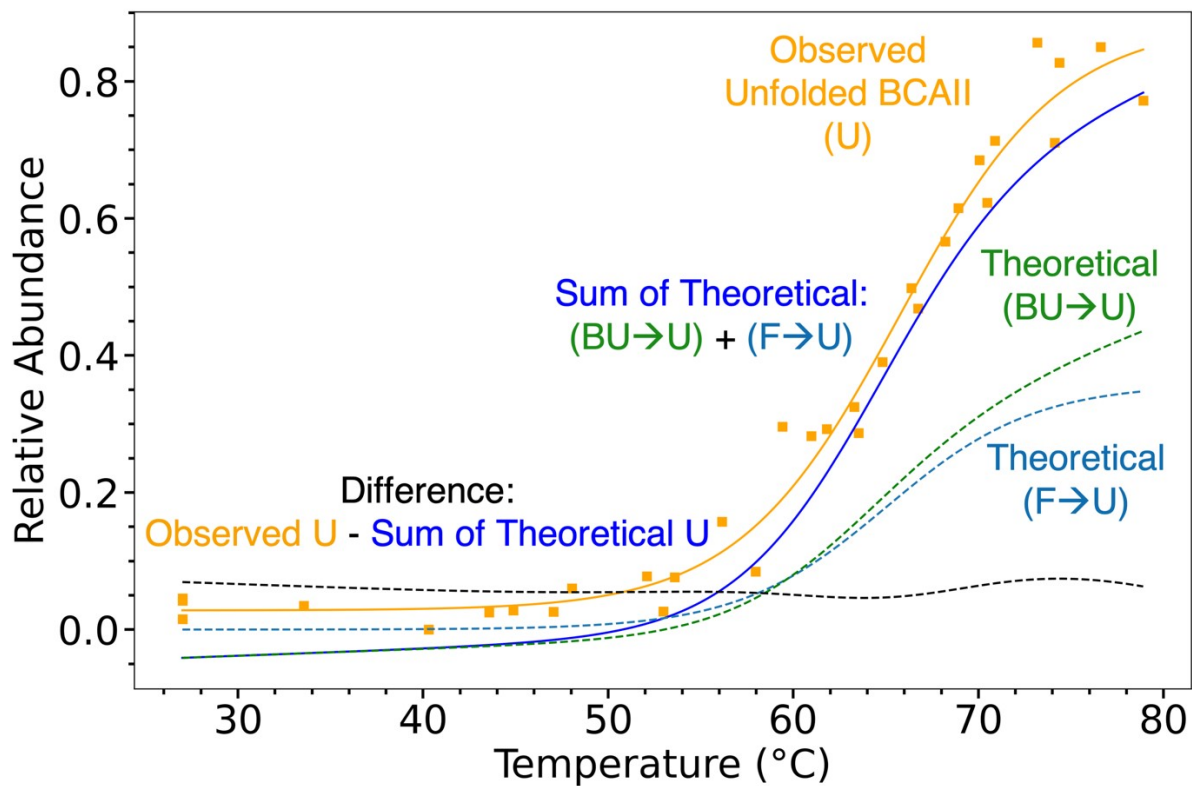

**Supporting Figure 4.** Modeling the theoretical abundance of U originating from the  $BF \rightarrow U$  pathway as a function of temperature using the difference between the summed abundance of the U that originates from the  $BU \rightarrow U$  and  $F \rightarrow U$  pathways and the measured abundance of U.

## References

- 1 J. S. Jordan and E. R. Williams, *Anal. Chem.*, 2022, **94**, 16894–16900.
